# Supplementary material for: Right-/left-handed helical G-quartet nanostructures with full-color and energy transfer circularly polarized luminescence
Source: Royal Society of Chemistry journal article supplement (doi:10.1039/d0cc02449j), 2020-01-01
Supplement: d0cc02449j1.pdf [file d0cc02449j1.pdf]

## Supporting Information

### Right-/Left-helical G-quartet nanostructures with full-color and energy transfer circularly polarized luminescence

Jingqi Chen, Xiaowei Liu, Zhiguang Suo, Chenqi Gao, Feifei Xing, Lingyan Feng\*, Chuanqi Zhao, Lianzhe Hu, Jinsong Ren and Xiaogang Qu\*

#### Experimental Section

##### Materials:

Guanosine 5'-monophosphate (GMP,  $\geq 99$ ), thioflavin T (ThT, 65-75%), thiazole orange (TO,  $\sim 90\%$ ), pyronin Y (PY, 50%) and meso-tetrakis(4-(N-methylpyridiumyl)) porphyrin (TMPyP4) were purchased from Sigma-Aldrich and used without further purification.  $\text{Sr}(\text{NO}_3)_2$  and KCl were purchased from aladin and used without further purification. The extinction coefficients of ThT, TO, PY and TMPyP4 are  $36000 \text{ M}^{-1} \text{ cm}^{-1}$  at 412 nm,  $63\,000 \text{ M}^{-1} \text{ cm}^{-1}$  at 500 nm,  $103\,000 \text{ M}^{-1} \text{ cm}^{-1}$  at 545 nm and  $226000 \text{ M}^{-1} \text{ cm}^{-1}$  at 422 nm, respectively. All aqueous solutions were prepared using ultra-pure water ( $18.2 \text{ M}\Omega$ , Milli-Q, Millipore).

##### Methods:

##### Preparation of GMP/ $\text{Sr}^{2+}$ nanofibers and GMP/ $\text{Sr}^{2+}$ -dyes nanofibers:

GMP (50 mM) and dyes with different concentrations were dissolved in pure water (1 mL). Then  $\text{Sr}(\text{NO}_3)_2$  solution (8 mM) was added to the mixture under slight shake. After 24 hours' incubation at  $4^\circ\text{C}$ , solid products formed. The mixture was centrifuged and purified three times to remove free small molecules.

##### Preparation of GMP/ $\text{Sr}^{2+}/\text{K}^+$ nanofibers and GMP/ $\text{Sr}^{2+}/\text{K}^+$ -dyes nanofibers:

GMP (50 mM), KCl (4.5 mM) and dyes with different concentrations were dissolved in pure water (1 mL). Then  $\text{Sr}(\text{NO}_3)_2$  solution (8 mM) was added to the mixture under slight shake. After 24 hours' incubation at  $4^\circ\text{C}$ , solid products were formed. The mixture is centrifuged and purified three times to remove free small molecules.

##### Measurements:

CD spectra were measured at  $20^\circ\text{C}$  on a JASCO J-1500 spectrometer attached with a temperature controller. CPL spectra were carried out on a JASCO CPL-300 spectrometer at  $20^\circ\text{C}$ . Fluorescence experiments were carried out on an Edinburgh instrument FS5 spectrofluorometer. Absorbance measurements were made on a LAMBDA 750 spectrophotometer. All spectra were measured using a quartz cuvette with 1.0 mm path length. Each spectrum was an average of three measurements. Scanning electron microscopy (SEM) was conducted on a GEMINI 300 field emission scanning microscope. Fourier transform infrared (FTIR) analyses were carried out on a Thermo Fisher Scientific NICOLET iS50 FT-IR spectrometer.

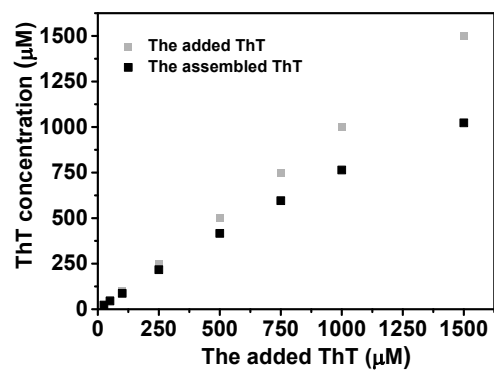

**Figure S1** The amount of the assembled ThT in g-nanofibers under different ThT concentrations.

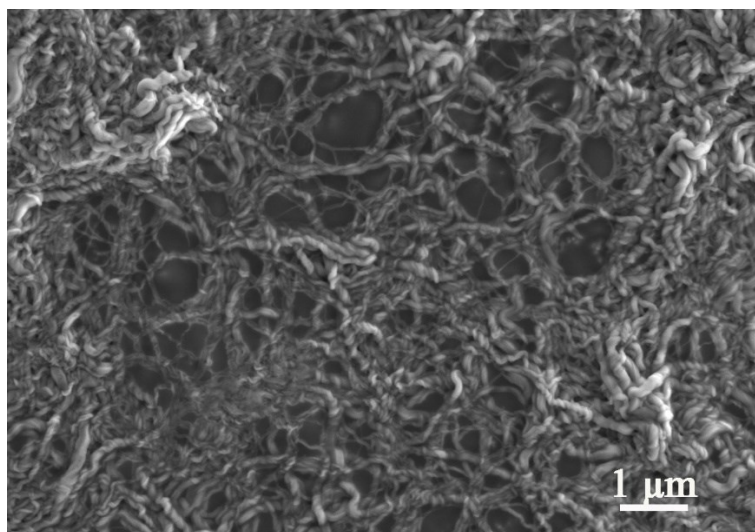

**Figure S2** SEM image of the complex of g-nanofibers and dyes.

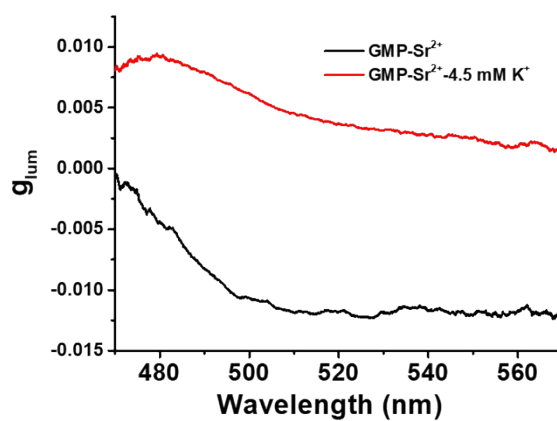

**Figure S3**  $g_{lum}$  of GMP/Sr<sup>2+</sup>-ThT nanofibers and GMP/Sr<sup>2+</sup>/K<sup>+</sup>-ThT nanofibers.

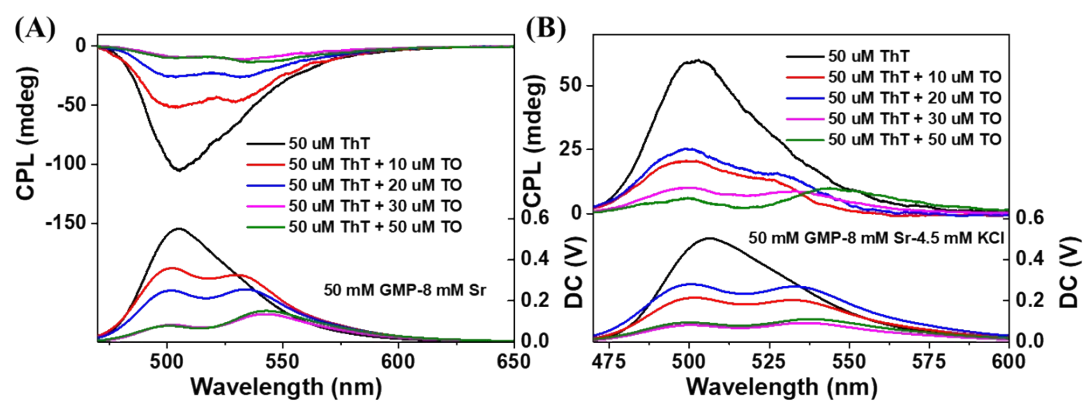

**Figure S4** CPL spectra of different ratios of ThT/ TO when assembled in GMP/Sr<sup>2+</sup> nanofibers (A) and GMP/Sr<sup>2+</sup>/K<sup>+</sup> nanofibers (B).
